1 **Serosurvey in two rural areas evidences recent and**  
2 **previously undetected WNV and SLEV circulation in**  
3 **Costa Rica**

4 **Previously undetected WNV and SLEV circulation in**  
5 **Costa Rica**

6 Marta Piche-Ovares<sup>1-2</sup>, Mario Romero-Vega<sup>3</sup>, Diana Vargas-González<sup>2</sup>, Daniel  
7 Barrantes-Murillo<sup>3</sup>, Claudio Soto-Garita<sup>1</sup>, Jennifer Francisco-Llamas<sup>4</sup>, Alejandro  
8 Alfaro-Alarcón<sup>3</sup>, Carlos Jiménez<sup>2</sup> & Eugenia Corrales-Aguilar<sup>1\*</sup>.

9 <sup>1</sup>Virology-CIET (Research Center for Tropical Disease), Universidad de Costa Rica,  
10 San José, Costa Rica.

11 <sup>2</sup> PIET (Tropical Disease Research Program), Department of Virology, School of  
12 Veterinary Medicine, Universidad Nacional, Heredia, Costa Rica.

13 <sup>3</sup>Department of Pathology, School of Veterinary Medicine, Universidad Nacional,  
14 Heredia, Costa Rica.

15 <sup>4</sup> Laboratorio de Investigación en Vectores-CIET (Research Center for Tropical  
16 Disease), Universidad de Costa Rica, San José, Costa Rica.

17 <sup>5</sup> School of Nursing and Health Studies, University of Miami

18

19 \*Corresponding author

20 E-mail: [eugenia.corrales@ucr.ac.cr](mailto:eugenia.corrales@ucr.ac.cr) (ECA)

## 21 **Abstract**

22 West Nile virus (WNV) and Saint Louis encephalitis virus (SLEV) share similar  
23 virus transmission cycles that involve birds as amplifiers and mosquitoes as vectors.  
24 Mammals, including humans, are dead-end-hosts that may be asymptomatic or  
25 develop more severe symptoms. Costa Rica is a hyperendemic country for several  
26 flaviviruses such as Dengue (DENV) and Zika (ZIKV) and previous research showed  
27 limited and restricted SLEV and WNV circulation in horses, sloths, and monkeys.  
28 Nevertheless, actual seroprevalence and high transmission areas are not yet  
29 identified. To determine putative WNV and SLEV circulation, we sampled peri-  
30 domestic and domestic animals, humans, wild birds, and mosquitoes in rural  
31 households located in two DENV and ZIKV hyperendemic regions during the rainy  
32 and dry seasons of 2017-2018 and conducted PRNT assays for serology and RT-  
33 PCR for virus detection. At Cuajiniquil, serological evidence of WNV and SLEV was  
34 found in equines, humans, chickens, and wild birds. Also, 5 seroconversion events  
35 were recorded for WNV (2 equine), SLEV (1 human), and DENV-1 (2 humans). At  
36 Talamanca, a lack of WNV circulation was found, but evidence of SLEV circulation  
37 was recorded in equines, humans, and wild birds. No evidence of active viral  
38 infection was found in any mosquitoes or wild bird samples. This seroconversion  
39 evidence supports the active and recent circulation of SLEV and WNV in these two  
40 regions. This study provides clear-cut evidence of WNV and SLEV circulation and  
41 should be considered by the health and epidemiology authorities for future  
42 prevention and differential diagnostics.

## 43 **Author summary**

44 Mosquitoes serve as vectors for the transmission of infectious diseases such  
45 as WNV and SLEV. The natural virus cycle of these viruses is maintained between  
46 birds and mosquitoes. Yet, humans and horses are dead end-hosts and can develop  
47 severe diseases such as encephalitis. We aimed to elucidate if WNV or SLEV were  
48 silently circulating in two regions of the country that historically report numerous  
49 cases of other arboviruses such as Dengue and Zika. Eight households were  
50 sampled at each region twice during the rainy (high number of arbovirus related  
51 infections are reported) and dry season (lower number of infections reported) to  
52 record seroconversion events. Serum samples from different species were analyzed  
53 using serology and virus presence was detected through molecular methods for wild  
54 bird and mosquito pools samples. We found serological evidence of WNV and SLEV  
55 infection in horses, humans, wild birds, and chicken samples, but did not detect  
56 actual virus in any tissue or mosquito sample. Taken together, our result shows the  
57 active but silent circulation of those viruses at both sampling sites. Action to include  
58 these arboviruses into diagnostics and public health measures must be taken.  
59

## 60 Introduction

61 *Flavivirus* genus is composed of single-stranded RNA viruses, which include  
62 Dengue virus (DENV), Saint Louis encephalitis virus (SLEV), Zika virus (ZIKV), West  
63 Nile virus (WNV), and Yellow Fever virus (YFV) [1, 2]. All of them are arboviruses  
64 that cause mosquito-borne diseases throughout the Americas and are responsible  
65 for thousands of deaths and hospitalizations every year [3, 4]. Many factors are  
66 recognized to contribute to the wide dissemination of those viruses, for instance  
67 poorly planned urbanization, geographical expansion of vectors, changing  
68 environmental conditions and deforestation [5-7].

69 The biological cycles of these viruses include a wide variety of susceptible  
70 species such as humans, rodents, horses, and non-human primates [8]. The clinical  
71 presentation of acute flavivirus infections in humans and animals ranges from mild  
72 illness (e.g., asymptomatic infection (50%-80%)) or self-limiting febrile episodes to  
73 severe and life-threatening diseases (hemorrhagic fever, shock syndrome,  
74 encephalitis, congenital defects) [9-11].

75 WNV and SLEV belong to the Japanese encephalitis sero-complex [12]. They  
76 are neurotropic flaviviruses that cause encephalitis, seizure disorders, and paralysis  
77 in humans and equines [10, 13-15]. These viruses are maintained in sylvatic cycles  
78 that use birds as amplifiers and mosquitoes of the *Culex* L. complex as vectors [16,  
79 17]. Many species have been associated as primary vectors or moderate vectors in  
80 the United States (*Culex tarsalis*, *Cx. pipiens*, *Cx. restuans*, *Cx. quinquefasciatus*,  
81 *Cx. stigmatosoma*, and *Cx. nigripalpus*) [16, 18, 19]. Also, migratory birds can serve

82 as dispersal vectors when they move seasonally and stop at different sites during  
83 their journey, establishing possible dispersal events [20]. Mammals, such as equines  
84 and humans, serve as dead-end hosts because of the low-level of viremia produced  
85 after infection [16, 21]. Severe cases can develop with high fever, neurological  
86 dysfunction, altered consciousness, encephalitis, or meningoencephalitis [14, 22].

87 WNV was introduced to North America from Israel in 1999, causing a  
88 widespread outbreak in equines, humans, and wild birds [23]. Following the first  
89 report of the virus in the USA, sporadic cases in humans were also reported through  
90 the continent (Canada, the Caribbean, and South America) [19, 24]. In Central  
91 America, massive avian deaths have not been yet reported, however serological  
92 evidence of the circulation of the virus in domestic and wildlife animals has been  
93 detected in El Salvador and Guatemala [25-27]. In North America, SLEV has been  
94 reported since 1930 [28]. More recently, in 2005 in Argentina, 9 deaths were  
95 associated with the virus [29]. In addition, Brazil and Argentina have reported  
96 sporadic cases of the disease in people that present mild symptoms like DENV  
97 disease, causing a misdiagnosis of the causal agent [30-32].

98 In Costa Rica, serological evidence of the circulation of WNV was found in  
99 equines from Guanacaste with a prevalence between 18-28% in 2004 [33]. In 2009,  
100 the first clinical case of WNV was reported in a horse also from Guanacaste, and  
101 since then annually new equine cases are reported, especially in the lowlands of the  
102 country at the rainy season [34, 35]. However, no bird mortality or human cases  
103 associate with the virus are so far recorded. Also, the country lacks information  
104 regarding which mosquitoes could be the possible vectors of WNV and SLEV.

105 However, some potential vectors are found present in the country as *Cx.*  
106 *quinquefasciatus*, *Cx. thriambus*, *Cx. nigripalpus* [36]. For SLEV, the only serological  
107 study was done by Medlin et al. 2016 in sloths (*Choloepus hoffmanni* and *Bradypus*  
108 *variegatus*) from the Caribbean region and antibodies against SLEV and WNV were  
109 found in those samples [37].

110 Costa Rica is endemic for other Flavivirus such as DENV and ZIKV [38, 39].  
111 Molecular epidemiology shows the circulation of DENV 1-3 in humans and molecular  
112 and serological evidence of DENV-4 circulation was found in wild animal samples  
113 [40, 41]. The co-circulation of different Flavivirus adds complexity in the diagnosis  
114 because of significant cross-reactivity and similarities in the undifferentiated fever-  
115 like initial symptoms. [42]. The National Health Service of Costa Rica does not  
116 consider SLEV and WNV in their routinely diagnostic panel of arbovirus disease,  
117 therefore, their epidemiology, and/or local presence in the human population is still  
118 poorly studied. The continuous monitoring in endemic areas such as our country but  
119 also other tropical areas is crucial to evaluate the risk of transmission to humans and  
120 animals [42, 43]. An early detection and timely reporting are fundamental to evaluate  
121 the risk of transmission. Surveillance based on a regular sampling of equines,  
122 chickens as sentinels and domestic birds has demonstrated a good sensitivity in  
123 different countries [42, 43].

124 The present study aims to evidence the silent circulation of WNV and SLEV  
125 in two rural areas of Costa Rica that are hyperendemic for other Flaviviruses such  
126 as DENV and ZIKV. Humans, wild birds, equines, and mosquito samples were  
127 analyzed to better understand if the viral cycle was present in those areas. We  
128 sampled during the rainy and dry seasons of 2017-2018 and conducted PRNT

129 assays for serology and RT-PCR for virus detection. Here we report several  
130 seroconversion events in different species, but no evidence of active viral infection  
131 was found in any mosquitoes or bird samples. This seroconversion evidence  
132 supports the active and recent though silent circulation of SLEV and WNV in these  
133 two regions. This information must be taken in account by the health and  
134 epidemiology authorities to act for future prevention and differential diagnostics.

## 135 **Methods**

### 136 **Study area**

137 The study was conducted in two regions of Costa Rica where previous  
138 flaviviruses infections (DENV, ZIKV and WNV) were officially recorded by Ministerio  
139 de Salud de Costa Rica (National Health Service) and the Servicio de Salud Animal  
140 (Animal Health Service) [34, 44, 45]. The sampling process was performed during  
141 the rainy and dry seasons of 2017 and 2018. The first site was Cuajiniquil, located  
142 at the Pacific coast (10°15'06" N, 85° 41'07" O) in the province of Guanacaste in the  
143 northwest part of Costa Rica (Fig 1, A). The second site was Talamanca (9°37'14.99"  
144 N, 82 50'39.98" O) located at the South Caribbean (Fig 2, A).

145 **Fig 1:** Neutralizing antibodies detected against different Flaviviruses in Cuajiniquil,  
146 Costa Rica during the rainy and dry season. A: Geographic distribution of  
147 households positive for antibodies of WNV (blue dots) and SLEV (red dots). At each  
148 household at least one individual was positive against WNV B: Number of individuals  
149 (chickens, wild birds, horses, and humans) positive against different Flaviviruses  
150 during the rainy and dry season.

151 **Fig 2:** Neutralizing antibodies detected against different Flaviviruses in the  
152 Caribbean Coast of Costa Rica during the rainy and dry seasons. A: Geographic  
153 distribution of households positive for antibodies of SLEV. At each household at least  
154 one individual was positive against SLEV. No evidence of antibodies against WNV  
155 was found.

156 At each site, 8 households were chosen for sampling and serum samples  
157 from equines, humans, chickens, and wild birds were taken. At the same time, wild  
158 birds were captured using mist-nets and were identify using morphological  
159 examination by referring to published identification keys. Then a complete post-  
160 mortem analysis was performed. The criteria employed to define the sites for the  
161 survey were: (i) presence of at least an unvaccinated for WNV equine, (ii) a forest  
162 patch near the household, and (iii) that the household inhabitants were willing to  
163 participate and signed the informed consent. Two sampling processes were done at  
164 each site: during the rainy and the dry season. The objective was to record putative  
165 seroconversion events.

## 166 **Sampling and classification of wild birds and mosquitoes,** 167 **sampling of equines and humans**

168 Birds were captured using mist-nets positioned at two sites (forest and  
169 peridomiciliary) in each household. At least, five birds per household were  
170 taxonomically identified (S1 text) and then euthanized by an intramuscular  
171 anesthesia overdose (ketamine 10 mg/kg + xylazine 1 mg/kg) [46, 47]. Blood sample  
172 was taken and stored at 4 °C until arrived at the laboratory where it was stored at -  
173 70 °C for later analysis. Then complete post-mortem analysis and histopathological



174 analysis were performed. Additionally, samples of most organs were aseptically  
175 collected (heart, lung, liver, spleen, intestine, kidney, brain, reproductive tract, eye,  
176 and proventriculus) and conserved in ARN later® (Thermo Scientific, cat AM0721).  
177 Also, a pool of organs was collected in ARN later® for Rt-PCR positivity initial  
178 screening.

179 Field sampling of mosquitoes was done in parallel. Encephalitis vector survey  
180 (EVS) traps (BioQuip Products Inc., California, USA) baited with CO<sub>2</sub> were placed  
181 during 12-16 hours in four different locations in each household: inside,  
182 peridomiciliary, barn, and forest. Mosquitoes were collected the next morning and  
183 transferred to the field lab on ice. A taxonomical identification to species level was  
184 done using published keys and compiled in S2 table [36, 48]. Mosquitoes were  
185 grouped according to the collection site and species (maximum 20 species per pool).  
186 Gravid females were analyzed individually to determine their blood preference.

187 Blood samples from equines were taken by puncture of the jugular vein, only  
188 animals older than 6 months were sampled. Gender, age, breed, and travel history  
189 were recorded. Chickens (*Gallus gallus*) samples were taken from the wing vein.  
190 The human sample was taken from peripheral venipuncture. Whole blood was  
191 centrifuged, and serum was store -20 °C for serological analysis.

## 192 **Serological Screening by plaque reduction neutralization** 193 **tests (PRNT)**

194 Flavivirus exposure was evaluated in sera obtained from horses, humans,  
195 domestic chickens, and wild birds by plaque reduction neutralization test (PRNT),

196 considered the gold standard for determining Flavivirus antibodies [49, 50]. For  
197 PRNT analysis, different flavivirus-envelope-protein-expressing yellow fever  
198 chimeric viruses donated by the CDC were used, except for ZIKV, in which an ATCC  
199 reference strain was used [51-53]. Serum samples were heat-inactivated at 56°C  
200 for 30 minutes. Then, they were used for an initial screening against WNV and SLEV  
201 using a 1:10 dilution [50, 54]. Briefly, samples were diluted 1:5 in MEM with 2% of  
202 FBS and mixed with an equal volume of each virus to an estimated end result of 10  
203 UFP/well. The virus-antibodies mix was incubated 1 hour at 37°C in a 5% CO<sub>2</sub>  
204 atmosphere, then a 100 µl volume was inoculated into a VERO (ATCC® CCL-81™)  
205 cells monolayer previously seeded in 48 well-plate and incubated for an hour. Then  
206 it was removed and 500 µl of MEM with 2% of FBS and 1% of  
207 carboxymethylcellulose were added. After 5 days of incubation, plates were fixed  
208 with formalin (3.7%) during an hour and stained with crystal violet (1%). Sera that  
209 resulted in a 90% of neutralization relative to the average of the viral control (no  
210 sera), were considered WNV or SLEV reactive. Due to smaller volumes of sera, wild  
211 bird and chicken samples were tested in a 96 well-plate format using a similar  
212 protocol and fixated at 3 days [54].

213 Samples from humans and equines that were considered reactive (90%  
214 reduction of foci) were tested in a serial two-fold dilution that ranged from 1:20-  
215 1:1280 against WNV (YFV 17D/WNV Flamingo 383-99), DENV 1-4 (YFV  
216 17D/DENV-1 PUO 359, YFV 17D/DENV-2 218, YFV 17D/DENV-3 PaH881/88, YFV  
217 17D/DENV-4 1228), ZIKV (ATCC® VR-748), SLEV (YFV 17D/SLEV CorAn 9124),  
218 and YF (YFV 17D) in similar conditions as the previously described protocol. Wild

219 birds and chicken serum samples were only tested against WNV and SLEV because  
220 of the limited sera volume. A plaque reduction of  $\geq 90\%$  was considered positive, with  
221 the titer measurement as the highest serum dilution showing  $\geq 90\%$  of plaque relative  
222 to the average of the viral control. A 4-fold difference in titer between the different  
223 flaviviruses was required for unequivocally classifying that serum sample as  
224 specifically neutralizing that particular flavivirus. In case that a 4-fold dilution  
225 difference was not reached, the serum was classified as flavivirus positive.

## 226 **RT-PCR in wild birds and mosquito samples**

227 Viral ARN was extracted from avian tissue (pool of organs) and mosquito  
228 pools using the TRIzol<sup>®</sup> (Ambion, 15596018) method according to the  
229 manufacturer's instructions. Reverse transcription was done using Revert Aid First  
230 Strand cDNA Synthesis Kit (Thermo Scientific cat K1622) with random hexamers  
231 primers. A negative (water) and positive control (GAPDH) were included, total ARN  
232 of the sample were measure using a NanoDrop<sup>™</sup> 2000 (Thermo Scientific, ND-  
233 2000).

234 Firstly, a semi-nested PCR was performed using Flavivirus genus specific  
235 primers localized in the NS5 following this protocol previously described [55]. A  
236 positive control (YFV 17D) and negative control (water) were included. PCR products  
237 were analyzed and quantified using QIAxcel DNA screening gel (Qiagen, 929554),  
238 a 220 pb band was expected [55]. Positive samples from the nested PCR were  
239 purified using ExoSAP-IT<sup>™</sup> (Applied Biosystems, 78201) following manufacturer  
240 instructions. Then, a Sanger sequencing of both strands was done by Macrogen Inc.  
241 (Seoul, South Korea). The resulting sequence was compared with entries in

242 GenBank database using the nucleotide basic alignment search tool (BLASTn)  
243 (<https://blast.ncbi.nlm.nih.gov/Blast.cgi>) and MEGA X software [56].

## 244 **Mosquito blood meal preferences**

245 To determine the bloodmeal preference, gravid females were taxonomically  
246 identified and processed individually. Mosquitoes were macerated in a 1.5 mL tube  
247 and DNA-RNA was extracted using NucleoSpin® TriPrep (740966.50, Macherey-  
248 Nagel). ARN that was obtained from these samples was analyzed against  
249 flaviviruses as previously described [55].

250 Bloodmeal preference was determined using a set of primers for cytochrome  
251 oxidase subunit I (COI), following the protocol of Townzen et al. 2008 [57]. PCR  
252 products were purified using ExoSAP-IT™ (Applied Biosystems, 78201) and  
253 subjected to nucleotide sequencing with forward and reverse primers at Macrogen  
254 Inc (Seoul, South Korea). The sequence was compared with entries in GenBank  
255 database using the nucleotide basic alignment search tool (BLASTn)  
256 (<https://blast.ncbi.nlm.nih.gov/Blast.cgi>) and MEGA X software [56].

## 257 **Statistical analysis**

258 Statistical analysis was conducted using R v3.6.2. A chi-square test was used  
259 to assess the correlation between gender and WNV and SLEV seropositivity. A  
260 Spearman rank correlation coefficient ( $R_s$ ) was used to correlate WNV seropositivity  
261 and age and Flavivirus positivity  $\alpha = 0.005$ .

## 262 **Ethical statement**

263           The study and associated protocols were designed based on national ethical  
264 legislation and approved by the Institutional Committee of Care and Use of Animals  
265 of the University of Costa Rica (CICUA-042-17), Committee of Biodiversity of the  
266 University of Costa Rica (VI-2994-2017), National System of Conservation Areas  
267 (SINAC): Tempisque Conservation Area (Oficio-ACT-PIM-070-17), La Amistad-  
268 Caribe Conservation Area (M-PC-SINAC-PNI-ACLAC-047-2018). The survey did  
269 not involve endangered or protected species.

270 After signing of an informed consent previously approved by the University of Costa  
271 Rica's Ethic Scientific Committee (CEC or IRB in English) (CEC-VI-4050-2017), a  
272 blood sample was taken from humans for serology analysis.

## 273 **Results**

### 274 **Several flaviviruses co-circulate in each sampled region,** 275 **WNV and SLEV as silent ones.**

276           Eight households were sampled at each arbovirus-hyperendemic region  
277 during the rainy and dry seasons of 2017-2018. At each household, serum samples  
278 from equines, humans, chickens, and wild birds were taken. At the same time, wild  
279 birds were captured using mist-nets and a complete post-mortem analysis was  
280 performed.

281           Serum samples from different species were analyzed using serology by  
282 PRNT  $\geq 90\%$  to record seroconversion events. A total of 106 equines, 34 humans,  
283 39 chickens, and 140 wild birds were tested. In Cuajiniquil, Guanacaste (Fig 1, B)

284 during the rainy season, 36 (41.86%) of the equines, 1 (6.25%) human, and 1  
285 (3.45%) chicken were indistinctively positive for neutralizing antibodies against WNV  
286 (4-fold dilution of difference) (Table 1 and 2). Also, serological evidence for SLEV  
287 was found in 11 (12.79%) equines, 1 (7.69%) wild bird and 1 (3.45%) chicken. This  
288 analysis also showed that 5 (31.25%) of the human samples has antibodies against  
289 DENV-1 (Table 2). At a later time point and during the dry season, samples were  
290 taken from the same individual (except for wild birds and chickens) to record  
291 putative seroconversion events. Five seroconversions were detected: 2 for WNV in  
292 a horse, 1 for SLEV and 2 for DENV-1 in humans. Also, 1 (2.86%) wild bird found  
293 positive had neutralizing antibodies against WNV (Fig 1, B). No serological evidence  
294 of DENV-2,3,4, ZIKV, and YF was found. At this site 15 horses (17.44%), 4 humans  
295 (33.33%), 37 chickens (97.43%) and 86 (98.83%) wild birds were negative for all the  
296 analyzed viruses. The wild bird species that presented neutralizing antibodies  
297 against WNV was identified as *Campylorhynchus rufinucha*, a resident very common  
298 species in that area [46].

299 **Table 1:** Serological characterization of the samples. List of individuals with  
300 neutralization antibodies against WNV and SLEV in Cuajiniquil. Two seroconversion  
301 events for WNV were recorded.

| Cuajiniquil |                       |             |                   |               |
|-------------|-----------------------|-------------|-------------------|---------------|
| Species     | Animal identification | Age (years) | PRNT titer        |               |
|             |                       |             | WNV               | SLEV          |
| Equines     | ESCA2                 | 7           | 1:320             | <b>1:1280</b> |
|             | ESCA3                 | 8           | <b>1:640</b>      | 1:80          |
|             | ESCA4                 | 6           | <b>1:640</b>      | 1:80          |
|             | ESCA5 <sup>a</sup>    | 6           | <b>&gt;1:1280</b> | <1:40         |
|             | ESCA6                 | 3           | <b>1:1280</b>     | 1:40          |
|             | ESCA7                 | 6           | 1:20              | <b>1:160</b>  |
|             | ESCA8                 | 2           | <b>&gt;1:1280</b> | 1:40          |

It is made available under a [CC-BY 4.0 International license](https://creativecommons.org/licenses/by/4.0/) .

|  |                    |     |                   |                   |
|--|--------------------|-----|-------------------|-------------------|
|  | ESCA9              | 5   | 1:160             | <b>1:640</b>      |
|  | ESCA12             | 5   | <b>1:640</b>      | 1:40              |
|  | ESCB2              | 3   | <b>1:160</b>      | 1:20              |
|  | ESCB3              | 5   | 1:40              | <b>1:640</b>      |
|  | ESCB4              | 3   | <b>1:160</b>      | 1:40              |
|  | ESCB7              | 2   | <b>1:160</b>      | 1:20              |
|  | ESCB8              | 5   | <b>1:640</b>      | 1:40              |
|  | ESCC2              | 4   | <b>1:640</b>      | 1:20              |
|  | ESCD1              | 4   | <b>1:1280</b>     | 1:80              |
|  | ESCD2              | 3   | <b>1:160</b>      | 1:20              |
|  | ESCD4              | 10  | 1:40              | <b>&gt;1:1280</b> |
|  | ESCD5              | 10  | <b>&gt;1:1280</b> | <1:40             |
|  | ESCD8              | 8   | <b>1:640</b>      | 1:20              |
|  | ESCD9              | 10  | <b>1:160</b>      | <1:40             |
|  | ESCD10             | 2   | <b>&gt;1:1280</b> | <1:40             |
|  | ESCD11             | 12  | <b>1:1280</b>     | <1:40             |
|  | ESCD15             | 22  | <b>1:320</b>      | 1:80              |
|  | ESCD17             | 3   | <b>1:640</b>      | <1:40             |
|  | ESCD19             | 2   | <b>1:640</b>      | <1:40             |
|  | ESCD24             | 1,5 | <b>1:160</b>      | <1:40             |
|  | ESCD26             | -   | <b>1:1280</b>     | <1:40             |
|  | ESCE1              | 3   | <b>1:320</b>      | 1:20              |
|  | ESCF1              | 8   | <b>&gt;1:1280</b> | 1:320             |
|  | ESCF3              | 12  | <b>1:640</b>      | 1:160             |
|  | ESCF6              | 10  | 1:80              | <b>1:320</b>      |
|  | ESCF9              | 10  | <b>1:160</b>      | 1:40              |
|  | ESCF10             | 8   | <b>1:160</b>      | <1:40             |
|  | ESCF13             | 5   | <b>1:640</b>      | 1:40              |
|  | ESCF14             | 12  | <b>1:640</b>      | 1:160             |
|  | ESCF15             | 4   | <b>1:320</b>      | 1:20              |
|  | ESCF16             | 2   | 1:40              | <b>1:640</b>      |
|  | ESCF18             | 10  | <b>1:320</b>      | 1:20              |
|  | ESCF20             | 6   | <b>1:160</b>      | <1:40             |
|  | ESCF21             | 8   | <b>1:320</b>      | 1:40              |
|  | ESCF24             | 5   | 1:40              | <b>1:160</b>      |
|  | ESCF25             | 8   | 1:20              | <b>1:320</b>      |
|  | ESCF27             | 5   | 1:640             | <b>1:5120</b>     |
|  | ESCF28             | 1   | <b>1:320</b>      | 1:20              |
|  | ESCG2              | 10  | 1:40              | <b>1:640</b>      |
|  | ESCG6              | 17  | <b>1:320</b>      | 1:40              |
|  | ESCG7 <sup>a</sup> | 16  | <b>1:640</b>      | 1:80              |

|                   |                                        |    |             |                  |
|-------------------|----------------------------------------|----|-------------|------------------|
| <b>Wild birds</b> | ASCD1 <i>Turdus grayi</i>              | Ad | 1:10        | <b>1:80</b>      |
|                   | ASCM9 <i>Campylorhynchus rufinucha</i> | Ad | <b>1:80</b> | >1:20            |
| <b>Chickens</b>   | GSCA1                                  | Ad | <b>1:80</b> | 1:10             |
|                   | GSCB1                                  | Ad | 1:40        | <b>&gt;1:640</b> |

302 <sup>a</sup> **Seroconversion events, Bold: Positive, Ad: Adult.**

303 **Table 2:** Neutralization titers in humans against different flaviviruses in the two  
 304 regions. In Cuajiniquil antibodies against WNV, SLEV and DENV-1 and two  
 305 seroconversions events, one for SLEV and one for DENV-1, were recorded.

| <b>Human identification</b> | <b>DENV-1</b>    | <b>DENV-2</b> | <b>DENV-3</b> | <b>DENV-4</b> | <b>WNV</b>       | <b>YFV</b> | <b>SLEV</b>      | <b>ZIKV</b> |
|-----------------------------|------------------|---------------|---------------|---------------|------------------|------------|------------------|-------------|
| <b>Cuajiniquil</b>          |                  |               |               |               |                  |            |                  |             |
| HSCA1 <sup>a</sup>          | <b>1:320</b>     | 1:160         | 1:40          | <1:20         | <1:20            | <1:20      | <1:20            | <1:20       |
| HSCA2                       | 1:80             | 1:80          | <1:20         | <1:20         | <b>&gt;1:640</b> | <1:20      | 1:20             | <1:20       |
| HSCA3                       | <b>&gt;1:640</b> | 1:320         | 1:40          | <1:20         | <1:20            | <1:20      | <1:20            | 1:40        |
| HSCC1                       | <b>1:640</b>     | <1:20         | <1:20         | <1:20         | <1:20            | <1:20      | <1:20            | <1:20       |
| HSCD2                       | <b>1:640</b>     | <1:20         | <1:20         | <1:20         | <1:20            | <1:20      | <1:20            | <1:20       |
| HSCD3                       | <b>1:160</b>     | <1:20         | <1:20         | <1:20         | <1:20            | <1:20      | <1:20            | <1:20       |
| HSCF2                       | <b>1:160</b>     | <1:20         | <1:20         | <1:20         | <1:20            | <1:20      | <1:20            | <1:20       |
| HSCH1 <sup>a</sup>          | <1:20            | <1:20         | <1:20         | <1:20         | <1:20            | <1:20      | <b>1:320</b>     | <1:20       |
| <b>Talamanca</b>            |                  |               |               |               |                  |            |                  |             |
| HTAA2                       | <1:20            | <1:20         | <1:20         | <1:20         | <1:20            | <1:20      | <b>&lt;1:160</b> | <1:20       |
| HTAD1                       | <b>1:640</b>     | <b>1:640</b>  | <1:20         | <1:20         | <1:20            | <1:20      | 1:20             | <1:20       |
| HTAD2                       | <b>1:160</b>     | <1:20         | <1:20         | <1:20         | <1:20            | <1:20      | <1:20            | <1:20       |
| HTAE1                       | 1:40             | 1:80          | 1:40          | 1:20          | <1:20            | <1:20      | <b>1:640</b>     | <1:20       |
| HTAF1                       | <b>1:160</b>     | <1:20         | <1:20         | <1:20         | <1:20            | <1:20      | <1:20            | <1:20       |
| HTAF2                       | <b>1:640</b>     | <1:20         | <1:20         | <1:20         | <1:20            | <1:20      | <1:20            | <1:20       |
| HTAG1                       | <1:20            | <1:20         | <1:20         | <1:20         | <1:20            | <1:20      | <b>1:160</b>     | <1:20       |
| HTAH1                       | <b>&gt;1:640</b> | 1:40          | <1:20         | <1:20         | <1:20            | <1:20      | <1:20            | <1:20       |
| HTAH2                       | <b>1:640</b>     | <1:20         | <1:20         | <1:20         | <1:20            | <1:20      | <1:20            | <1:20       |
| HTAH3                       | <b>1:320</b>     | <b>1:160</b>  | 1:20          | <1:20         | <1:20            | <1:40      | <1:20            | <1:20       |

306 <sup>a</sup> **Seroconversion events, bold: Positive**

307 In contrast, we did not detect any serological evidence for WNV in Talamanca  
 308 (Fig 2, B), but evidence of previous contact with SLEV. Neutralizing antibodies  
 309 against SLEV were found in 12 (60%) equines, 3 (17.65%) humans, and 2 (2.47%)



310 wild birds (Table 2 and 3). Also, five (29.41%) human samples were positive against  
 311 DENV-1 and two (11.76%) have neutralizing antibodies against DENV-1 and DENV-  
 312 2 (Table 2). At this site 8 equines (40%%), 7 humans (41.17%) and 86 wild birds  
 313 (97.72%) were negative for all flavivirus and no serological evidence for DENV-3,  
 314 DENV-4, ZIKV, and YF was found. Wild birds with SLEV-neutralizing antibodies  
 315 were *Empidonax virescens*, a migratory species that migrate from Canada and  
 316 *Myiozetetes similis*, a resident species of Costa Rica [46].

317 **Table 3:** Serological characterization of the samples. List of individuals with  
 318 neutralization antibodies against SLEV in Talamanca. No evidence of WNV were  
 319 recorded.

| Talamanca                        |                       |                                  |            |              |
|----------------------------------|-----------------------|----------------------------------|------------|--------------|
| Species                          | Animal identification | Age (years)                      | PRNT titer |              |
|                                  |                       |                                  | WNV        | SLEV         |
| <b>Equines</b>                   | ETAC1                 | 12                               | <1:20      | <b>1:640</b> |
|                                  | ETAC2                 | 9                                | 1:20       | <b>1:160</b> |
|                                  | ETAD1                 | 20                               | 1:40       | <b>1:320</b> |
|                                  | ETAE1                 | 10                               | 1:40       | <b>1:160</b> |
|                                  | ETAE2                 | 8                                | 1:20       | <b>1:320</b> |
|                                  | ETAE3                 | 13                               | 1:20       | <b>1:160</b> |
|                                  | ETAE4                 | 11                               | <1:20      | <b>1:160</b> |
|                                  | ETAE5                 | 5                                | <1:20      | <b>1:160</b> |
|                                  | ETAF1                 | 4.5                              | 1:40       | <b>1:640</b> |
|                                  | ETAH2                 | 7                                | 1:40       | <b>1:160</b> |
|                                  | ETAH5                 | 8                                | 1:20       | <b>1:160</b> |
|                                  | ETAH6                 | 8                                | <1:20      | <b>1:320</b> |
|                                  | <b>Wild birds</b>     | ATAH5 <i>Myiozetetes similis</i> | Ad         | 1:10         |
| ATAJ1 <i>Empidonax virescens</i> |                       | Ad                               | 1:10       | <b>1:80</b>  |

320 **Bold: Positive, Ad: Adult.**

321 A chi-square test of the equine serum samples was used to assess correlation  
 322 between gender and WNV or SLEV seropositivity. The results showed no significant  
 323 correlation between gender and WNV or SLEV seropositivity ( $X^2 = 2.2512$ ,  $df=2$ ,  
 324  $p=0.81$ ).

325 Some serum samples were classified as Flavivirus positive (n=22, 25.58%)  
326 since they reacted with more than one of the viruses tested. These samples were  
327 analyzed by a Spearman correlation ( $R_s$ ) to assess if age and Flavivirus positivity  
328 were related. This resulted in a moderate positive correlation ( $R_s= 0.3625$  ( $p=0.05$  y  
329  $p<0.01$ )) (Fig 3). Two main reasons could explain these results, first that animals  
330 throughout life have sequential infections by different flavivirus or that other  
331 flaviviruses that were not considered in this study are circulating in those areas.

332 **Fig 3:** Spearman positive correlation ( $R_s= 0.3625$  ( $p=0.05$  y  $p<0.01$ )) between age  
333 and Flavivirus positivity. A: Association between the age and the WNV seropositivity  
334 in equines of the Pacific Coast. B: Association between the age and Flavivirus  
335 seropositivity in equines of the Pacific Coast.

336 **No molecular evidence of active virus circulation was**  
337 **found in mosquitoes and wild bird samples.**

338 To study the epizootic cycle of these arboviruses, mosquitoes and wild birds  
339 were sampled. A total of 140 wild birds were collected during the period of the study.  
340 The complete post-mortem and histopathological analysis show no associated  
341 lesions to arbovirus infections. In Cuajiniquil area 52 wild birds from 15 different  
342 species were captured; 2 species were migratory (S1 table). In Talamanca, 88 wild  
343 birds were captured from 29 different species, 6 species were migratory. This area  
344 is a very important point of migration from North America to South America [58].  
345 Also, 1373 mosquitoes were captured in 128-night tramps. The most frequent  
346 species in the Cuajiniquil area (n=554) were *Deinocerites pseudus* (24.91%, n=138),  
347 *Cx. quinquefasciatus* (17.69%) and *Anopheles albimanus* (8.66%). In the area of

348 Talamanca (n=819), the most frequent species were *Cx. quinquefasciatus* (45.91%,  
349 n=376), *Cx. coronator* (11.60%, n=95), and *Mansonia titillans* (10.01%, n=82). The  
350 complete classification of the mosquitoes according to the location and the sampled  
351 season is available in S2 table.

352 Mosquitoes were grouped according to the collection site and species  
353 (maximum 20 species per pool). Gravid females were analyzed individually to  
354 determine their blood preference. Mosquito pools (n=164 for Cuajiniquil and n=198  
355 for Talamanca), gravid females (n=32) and wild birds (n=140) were analyzed by a  
356 semi-nested RT-PCR using Flavivirus genus specific primers [55]. PCR products  
357 were analyzed and quantified using QIAxcel DNA screening gel (Qiagen, 929554).  
358 Two mosquito pools from Talamanca were detected positive for flavivirus (Table 3).  
359 Positive pools were submitted for nucleotide sequencing and showed 100% of  
360 homology to a mosquito flavivirus. In the case of wild bird samples, no positive PCR  
361 results were obtained.

362 **Table 3:** Mosquitoes positive in Flavivirus RT-PCR and its homology.

| Pool identification | Household | Species                        | Homology            | GenBank    |
|---------------------|-----------|--------------------------------|---------------------|------------|
| TCC28               | CTAC      | <i>Culex (Melanoconion) sp</i> | Mosquito flavivirus | MN856966.1 |
| TDC19               | CTAD      | <i>Aedes aegypti</i>           | Aedes flavivirus    | MK241496.1 |

363

364 **The analyses of mosquito blood meals show a species**  
365 **diversity of feeding sources.**

366 Mosquito blood meals preference was analyzed to establish the diversity of  
367 blood meals sources and participation of these identified species in the putative virus

368 cycle. Mosquitoes that were classified as gravid females were taxonomically  
369 identified using morphological characters and analyzed for their blood meal  
370 preference by detection of COI [57]. Twenty-three of the 32 mosquitoes led to  
371 positive DNA amplification: from Cuajiniquil *Cx. restrictor* (n=1), *Cx. quinquefasciatus*  
372 (n=1), *Anopheles albimanus* (n=1), and *Deinocerites pseudus* (n=1) and from  
373 Talamanca: *Cx. quinquefasciatus* (n=9), *Cx. coronator* (n=3), *Cx. (Melanoconion) sp*  
374 (n=2), *Psorophora ferox* (n=1), *Cx. pseudostigmatosoma* (n=2), and *Mansonia*  
375 *titillans* (n=1).

376 After sequencing and blasting analyses, we detected dog (*Canis lupus*  
377 *familiaris*) (n=6, 31.57%), human (*Homo sapiens*) (n=5, 26.31%), equine (*Equus*  
378 *caballus*), (n=4, 1.05%), sheep (*Ovis aries*) (n=4, 21.05%), and wild bird (*Columbina*  
379 *paserina*) (n=1, 5.2%) blood used as feeding source. One sample showed a mixed  
380 blood pattern (dog/human).

## 381 Discussion

382 In this study we detected a silent circulation of WNV and SLEV in two regions  
383 of Costa Rica (Cuajiniquil and Talamanca). Nevertheless, we did not detect virus  
384 ARN in wild bird organs or mosquito pools. Therefore, an active circulation of those  
385 viruses could only be recorded by the seroconversion events that took place at both  
386 sampling sites and through neutralizing antibodies found in wild bird samples.  
387 Interestingly, our results show simultaneous circulation of several flaviviruses in the  
388 sampled areas: WNV, SLEV, and DENV-1 in Cuajiniquil and DENV-1 and DENV-2  
389 in Talamanca. In these areas positive equines against WNV by IgM and human  
390 cases of DENV and ZIKV by the National Health authorities have previously been

391 reported [34, 44, 59]. It is tempting to speculate that human infections by WNV and  
392 SLEV have possibly been mistaken as DENV and ZIKV symptoms and thus  
393 misdiagnosed.

394 Serological analysis showed that neutralizing antibodies against WNV and  
395 SLEV are uniformly distributed in Cuajiniquil. There, in each household at least one  
396 of the sampled species had neutralizing antibodies (wild birds, chickens, equines,  
397 and/or humans). On the other hand, on the Caribbean side no evidence of previous  
398 contact with WNV was recorded but, serological evidence against SLEV was  
399 documented in wild birds, horses, and humans, and likewise each household had at  
400 least one species positive. Previous studies made in hamsters show that previous  
401 immunity with SLEV confers protection against clinical encephalitis and death after  
402 been infected with WNV [60]. This could explain the no case report of WNV disease  
403 in Talamanca. The strikingly high seropositivity to WNV in Cuajiniquil and SLEV at  
404 both regions reveals that these viruses are widely distributed.

405 We detected 4 wild birds with neutralizing antibodies (3 for SLEV and 1 for  
406 WNV) belonging to four different species. Three of them were resident wild birds  
407 (*Campylorhynchus rufinucha*, *Myiozetetes similis*, *Turdus gray*) suggesting a local  
408 contact with the virus. It is tempting to speculate that the virus cycle mosquito-bird-  
409 mosquito is thus locally well established. The species *Empidonax virescen* is a  
410 migratory species that was captured in Talamanca. This area is one of the most  
411 important sites for wild bird migration in the world [58]. During the yearly migration  
412 interval from October to November thousands of wild birds fly over here to South  
413 America [58, 61]. This migratory behavior could lead to the introduction of wild bird-

414 hosted flaviviruses but may bring even more new strains of SLEV and WNV to our  
415 country [20, 62].

416 WNV and SLEV share common mosquito vectors (*Culex*) and present  
417 comparable transmission cycles and clinical signs [15, 18, 63]. At both sampling  
418 areas, *Cx. quinquefasciatus* was one of the most abundant mosquito species  
419 collected, other species of *Culex* such as *Cx. nigripalpus* also were identified. This  
420 species has been proposed as a vector for WNV and SLEV in America [21, 64-66].  
421 The blood meals detected, and the species distribution further confirms the presence  
422 of *Culex* species that serve as bridge vectors capable of transmitting WNV between  
423 wild birds and end-hosts e.g., humans and equines.

424 Furthermore, an important percentage of the equines at both sampling sites  
425 were classified as “Flavivirus positive”. This means that they present similar  
426 neutralizing antibodies titers for more than one flavivirus. This can be explained by  
427 two main reasons: i) that animals came in contact early in their lives with one virus  
428 and then have contact with other Flavivirus throughout life, thus sequential infections  
429 by different flaviviruses, this is supported by the moderate correlation obtained where  
430 older animals have more cross-reactivity compared with younger ones; ii) that other  
431 flaviviruses not evaluated in this study also co-circulate. For instance, in Brazil,  
432 Ecuador and Bolivia antibodies against Rocio Virus and Ileus were reported in  
433 equines [67, 68]. This emphasizes the importance of continued monitoring and  
434 detection of different flavivirus species in the country.

435 Costa Rica like the rest of Latin America, lacks information about the  
436 seroepidemiology of WNV and SLEV. Our study demonstrates an ongoing  
437 circulation of WNV in the region of Cuajiniquil and SLEV. Also, shows the co-

438 circulation of other Flaviviruses such as DENV and ZIKV, and suggests that others  
439 flaviviruses could be also silently circulating [39]. Regions with multiple Flaviviruses  
440 encounter a significant challenge in the clinical and serological diagnosis. Laboratory  
441 testing is crucial for accurate diagnosis because symptoms can overlap. Almost all  
442 ELISA kits are not completely devoid from cross-reactions to properly interpret  
443 results in these serological assays, and thus procure potential misinterpretation [42].  
444 Molecular diagnosis by qRT-PCR of serum, plasma, and cerebrospinal fluid is of  
445 limited value for routine diagnosis, due to low level and short-lived viremia generated  
446 by these viruses [42]. The PRNT  $\geq 90\%$  technique is the gold standard for identifying  
447 antibodies against different Flaviviruses, but this technique is expensive, needs  
448 laboratory facilities and requires careful interpretation. Because of the above,  
449 flaviviruses serological diagnosis is a real challenge [42].

450 Active surveillance for WNV and SLEV must be prioritized and performed in  
451 flavivirus-endemic areas in mosquitoes, wild birds, and sentinel chickens to detect  
452 the virus before the outburst of disease or outbreaks in equines and humans. Also,  
453 WNV and SLEV must be considered as a differential diagnosis in patients suspected  
454 for DENV and ZIKV infection. Further studies must be done to establish the national  
455 seroprevalence and genotypes that are circulating in the country. Costa Rica as a  
456 tropical country has the potential of introduction and establishment of new  
457 flaviviruses that could cause a more complex epidemiologic scenario.

458 As prior studies show that a previous infection with ZIKV or DENV modulates  
459 a second infection with a different virus, increasing the probability of symptomatic  
460 and severe disease [69]. Therefore, there are still concerns in the cross-reaction

461 between them, their potential immune interplay, and the challenge for a correct  
462 diagnostic.

## 463 **Acknowledgments**

464 We thank to all the people who allowed us to sample at their homes. We thank  
465 the Arbovirus Reference Collection (ARC) from the Centers for Disease Control and  
466 Prevention, National Center for Emerging and Zoonotic Infectious Diseases, Division  
467 of Vector-Borne Diseases, Arboviral Diseases Branch, Diagnostic and Reference  
468 Team, Reference and Reagent Laboratory and Sanofi Pasteur for the chimeric  
469 viruses contribution.

## 470 **Reference**

- 471 1. Barrows NJ, Campos RK, Liao KC, Prasanth KR, Soto-Acosta R, Yeh SC, et  
472 al. Biochemistry and Molecular Biology of Flaviviruses. *Chem Rev*.  
473 2018;118(8):4448-82. Epub 2018/04/13. doi: 10.1021/acs.chemrev.7b00719.  
474 PubMed PMID: 29652486; PubMed Central PMCID: PMC5937540.
- 475 2. Simmonds P, Becher P, Bukh J, Gould EA, Meyers G, Monath T, et al. ICTV  
476 Virus Taxonomy Profile: Flaviviridae. *J Gen Virol*. 2017;98(1):2-3. doi:  
477 10.1099/jgv.0.000672. PubMed PMID: 28218572; PubMed Central PMCID:  
478 PMC5370391.
- 479 3. Holbrook MR. Historical Perspectives on Flavivirus Research. *Viruses*.  
480 2017;9(5). Epub 2017/04/30. doi: 10.3390/v9050097. PubMed PMID: 28468299;  
481 PubMed Central PMCID: PMC5454410.
- 482 4. Pierson TC, Diamond MS. The continued threat of emerging flaviviruses.  
483 *Nat Microbiol*. 2020;5(6):796-812. Epub 2020/05/04. doi: 10.1038/s41564-020-  
484 0714-0. PubMed PMID: 32367055.
- 485 5. Tabachnick WJ. Climate Change and the Arboviruses: Lessons from the  
486 Evolution of the Dengue and Yellow Fever Viruses. *Annu Rev Virol*. 2016;3(1):125-  
487 45. Epub 2016/07/22. doi: 10.1146/annurev-virology-110615-035630. PubMed  
488 PMID: 27482902.
- 489 6. Weaver SC. Urbanization and geographic expansion of zoonotic arboviral  
490 diseases: mechanisms and potential strategies for prevention. *Trends Microbiol*.



- 491 2013;21(8):360-3. doi: 10.1016/j.tim.2013.03.003. PubMed PMID: 23910545;  
492 PubMed Central PMCID: PMCPMC5193003.
- 493 7. Gould EA, Higgs S. Impact of climate change and other factors on emerging  
494 arbovirus diseases. *Trans R Soc Trop Med Hyg.* 2009;103(2):109-21. Epub  
495 2008/09/16. doi: 10.1016/j.trstmh.2008.07.025. PubMed PMID: 18799177; PubMed  
496 Central PMCID: PMCPMC2915563.
- 497 8. Pandit PS, Doyle MM, Smart KM, Young CCW, Drape GW, Johnson CK.  
498 Predicting wildlife reservoirs and global vulnerability to zoonotic Flaviviruses. *Nat*  
499 *Commun.* 2018;9(1):5425. Epub 2018/12/21. doi: 10.1038/s41467-018-07896-2.  
500 PubMed PMID: 30575757; PubMed Central PMCID: PMCPMC6303316.
- 501 9. Daep CA, Muñoz-Jordán JL, Eugenin EA. Flaviviruses, an expanding threat  
502 in public health: focus on dengue, West Nile, and Japanese encephalitis virus. *J*  
503 *Neurovirol.* 2014;20(6):539-60. Epub 2014/10/07. doi: 10.1007/s13365-014-0285-z.  
504 PubMed PMID: 25287260; PubMed Central PMCID: PMCPMC4331079.
- 505 10. Rosa R, Costa EA, Marques RE, Oliveira TS, Furtini R, Bomfim MR, et al.  
506 Isolation of Saint Louis encephalitis virus from a horse with neurological disease in  
507 Brazil. *PLoS Negl Trop Dis.* 2013;7(11):e2537. Epub 2013/11/21. doi:  
508 10.1371/journal.pntd.0002537. PubMed PMID: 24278489; PubMed Central  
509 PMCID: PMCPMC3836713.
- 510 11. Platt DJ, Miner JJ. Consequences of congenital Zika virus infection. *Curr*  
511 *Opin Virol.* 2017;27:1-7. Epub 2017/11/06. doi: 10.1016/j.coviro.2017.09.005.  
512 PubMed PMID: 29080429; PubMed Central PMCID: PMCPMC5814142.
- 513 12. Kuno G, Chang GJ, Tsuchiya KR, Karabatsos N, Cropp CB. Phylogeny of  
514 the genus Flavivirus. *J Virol.* 1998;72(1):73-83. doi: 10.1128/JVI.72.1.73-83.1998.  
515 PubMed PMID: 9420202; PubMed Central PMCID: PMCPMC109351.
- 516 13. Castillo-Olivares J, Wood J. West Nile virus infection of horses. *Vet Res.*  
517 2004;35(4):467-83. doi: 10.1051/vetres:2004022. PubMed PMID: 15236677.
- 518 14. Hayes EB, Sejvar JJ, Zaki SR, Lanciotti RS, Bode AV, Campbell GL.  
519 Virology, pathology, and clinical manifestations of West Nile virus disease. *Emerg*  
520 *Infect Dis.* 2005;11(8):1174-9. doi: 10.3201/eid1108.050289b. PubMed PMID:  
521 16102303; PubMed Central PMCID: PMCPMC3320472.
- 522 15. Diaz A, Coffey LL, Burkett-Cadena N, Day JF. Reemergence of St. Louis  
523 Encephalitis Virus in the Americas. *Emerg Infect Dis.* 2018;24(12). doi:  
524 10.3201/eid2412.180372. PubMed PMID: 30457961; PubMed Central PMCID:  
525 PMCPMC6256408.
- 526 16. Colpitts TM, Conway MJ, Montgomery RR, Fikrig E. West Nile Virus:  
527 biology, transmission, and human infection. *Clin Microbiol Rev.* 2012;25(4):635-48.  
528 doi: 10.1128/CMR.00045-12. PubMed PMID: 23034323; PubMed Central PMCID:  
529 PMCPMC3485754.
- 530 17. Diaz LA, Flores FS, Quaglia A, Contigiani MS. Intertwined arbovirus  
531 transmission activity: reassessing the transmission cycle paradigm. *Front Physiol.*

- 532 2012;3:493. Epub 2013/01/11. doi: 10.3389/fphys.2012.00493. PubMed PMID:  
533 23335900; PubMed Central PMCID: PMC3542535.
- 534 18. Ciota AT. West Nile virus and its vectors. *Curr Opin Insect Sci.* 2017;22:28-  
535 36. Epub 2017/05/09. doi: 10.1016/j.cois.2017.05.002. PubMed PMID: 28805636.
- 536 19. Kramer L, Ciota A, Kilpatrick M. Introduction, Spread, and Establishment of  
537 West Nile Virus in the Americas. *J Med Entomol.* 2019;56(6):1448-55. Epub 24  
538 September 2019. doi: <https://doi.org/10.1093/jme/tjz151>.
- 539 20. Viana DS, Santamaría L, Figuerola J. Migratory Birds as Global Dispersal  
540 Vectors. *Trends Ecol Evol.* 2016;31(10):763-75. Epub 20160806. doi:  
541 10.1016/j.tree.2016.07.005. PubMed PMID: 27507683.
- 542 21. Day JF. Predicting St. Louis encephalitis virus epidemics: lessons from  
543 recent, and not so recent, outbreaks. *Annu Rev Entomol.* 2001;46:111-38. doi:  
544 10.1146/annurev.ento.46.1.111. PubMed PMID: 11112165.
- 545 22. Chiu CY, Coffey LL, Murkey J, Symmes K, Sample HA, Wilson MR, et al.  
546 Diagnosis of Fatal Human Case of St. Louis Encephalitis Virus Infection by  
547 Metagenomic Sequencing, California, 2016. *Emerg Infect Dis.* 2017;23(10):1964-8.  
548 doi: 10.3201/eid2310.161986. PubMed PMID: 28930022; PubMed Central PMCID:  
549 PMC5621550.
- 550 23. Briese T, Jia X-Y, Huang C, Grady LJ, Lan Lipkin W. Identification of a  
551 Kunjin/West Nile-like flavivirus in brains of patients with New York encephalitis. *The*  
552 *Lancet.* 1999;354(9186):1261-2. doi: <https://doi.org/10.1016/S0140->  
553 [6736\(99\)04576-6](https://doi.org/10.1016/S0140-6736(99)04576-6).
- 554 24. Hadfield J, Brito AF, Swetnam DM, Vogels CBF, Tokarz RE, Andersen KG,  
555 et al. Twenty years of West Nile virus spread and evolution in the Americas  
556 visualized by Nextstrain. *PLoS Pathog.* 2019;15(10):e1008042. Epub 2019/10/31.  
557 doi: 10.1371/journal.ppat.1008042. PubMed PMID: 31671157; PubMed Central  
558 PMCID: PMC6822705.
- 559 25. Komar N, Clark GG. West Nile virus activity in Latin America and the  
560 Caribbean. *Rev Panam Salud Publica.* 2006;19(2):112-7. doi: 10.1590/s1020-  
561 49892006000200006. PubMed PMID: 16551385.
- 562 26. Morales-Betoulle ME, Komar N, Panella NA, Alvarez D, López MR, Betoulle  
563 JL, et al. West Nile virus ecology in a tropical ecosystem in Guatemala. *Am J Trop*  
564 *Med Hyg.* 2013;88(1):116-26. Epub 2012/11/13. doi: 10.4269/ajtmh.2012.12-0276.  
565 PubMed PMID: 23149586; PubMed Central PMCID: PMC3541721.
- 566 27. Cruz L, Cardenas VM, Abarca M, Rodriguez T, Reyna RF, Serpas MV, et al.  
567 Short report: serological evidence of West Nile virus activity in El Salvador. *Am J*  
568 *Trop Med Hyg.* 2005;72(5):612-5. PubMed PMID: 15891137.
- 569 28. Bredeck JF. The Story of the Epidemic of Encephalitis in St. Louis. *Am J*  
570 *Public Health Nations Health.* 1933;23(11):1135-40. doi: 10.2105/ajph.23.11.1135.  
571 PubMed PMID: 18013860; PubMed Central PMCID: PMC3541721.

- 572 29. Diaz LA, Ré V, Almirón WR, Farías A, Vázquez A, Sanchez-Seco MP, et al.  
573 Genotype III Saint Louis encephalitis virus outbreak, Argentina, 2005. *Emerg Infect*  
574 *Dis.* 2006;12(11):1752-4. doi: 10.3201/eid1211.060486. PubMed PMID: 17283629;  
575 PubMed Central PMCID: PMCPMC3372344.
- 576 30. Heinen LB, Zuchi N, Serra OP, Cardoso BF, Gondim BH, Dos Santos MA,  
577 et al. Saint Louis encephalitis virus in Mato Grosso, central Western, Brazil. *Rev*  
578 *Inst Med Trop Sao Paulo.* 2015;57(3):215-20. doi: 10.1590/S0036-  
579 46652015000300006. PubMed PMID: 26200961; PubMed Central PMCID:  
580 PMCPMC4544245.
- 581 31. Mondini A, Bronzoni RV, Cardeal IL, dos Santos TM, Lázaro E, Nunes SH,  
582 et al. Simultaneous infection by DENV-3 and SLEV in Brazil. *J Clin Virol.*  
583 2007;40(1):84-6. Epub 2007/07/19. doi: 10.1016/j.jcv.2007.06.007. PubMed PMID:  
584 17658293.
- 585 32. Lopez H, Neira J, Morales MA, Fabbri C, D'Agostino ML, Zitto T. Encefalitis  
586 por virus de San Luis en la ciudad de Buenos Aires durante el brote de Dengue  
587 2009. *Medicina.* 2010;70:247-50.
- 588 33. Hobson-Peters J, Arévalo C, Cheah WY, Blitvich BJ, Tan CS, Sandis A, et  
589 al. Detection of antibodies to West Nile virus in horses, Costa Rica, 2004. *Vector*  
590 *Borne Zoonotic Dis.* 2011;11(8):1081-4. Epub 2011/03/21. doi:  
591 10.1089/vbz.2010.0198. PubMed PMID: 21417920.
- 592 34. Jiménez C, Romero M, Piche M, Baldi M, Alfaro A, Chaves A, et al.  
593 Arboviral encephalitis in Costa Rican horses: 2009-2016. *International Journal of*  
594 *Infectious Diseases.* 2016;53:153. doi: <https://doi.org/10.1016/j.ijid.2016.11.375>.
- 595 35. Calderón-Arguedas O, Troyo A, Solano ME, Avendaño A. Culicidofauna  
596 Asociada con Contenedores Artificiales en la Comunidad "La Carpío", Costa Rica.  
597 *Rev Costarric Salud Publica.* 2009;18(1).
- 598 36. Vargas M. El mosquito un enemigo peligroso (Diptera: Culicidae). 1<sup>st</sup> ed.  
599 San José, Costa Rica: Universidad de Costa Rica; 1998.
- 600 37. Medlin S, Deardorff ER, Hanley CS, Vergneau-Grosset C, Siudak-Campfield  
601 A, Dallwig R, et al. Serosurvey of selected arboviral pathogens in free-ranging,  
602 two-toed sloths (*Choloepus hoffmanni*) and three-toed sloths  
603 (*Bradypus variegatus*) in Costa Rica, 2005-07. *J Wildl Dis.* 2016;52(4):883-92.  
604 Epub 2016/08/01. doi: 10.7589/2015-02-040. PubMed PMID: 27479900; PubMed  
605 Central PMCID: PMCPMC5189659.
- 606 38. Cerdas-Quesada CA, Retana-Salazar AP. Characterization and  
607 phylogenetic relationships of strains of Dengue type 1 virus from Costa Rica. *Rev*  
608 *Biol Trop.* 2007;55(2):365-72. doi: 10.15517/rbt.v55i2.6016. PubMed PMID:  
609 19069751.
- 610 39. INCIENSA [Internet]. Informe de vigilancia de Arbovirus basada en  
611 laboratorio. 2019 [Cited 2020 Marzo 3] Available from:  
612 [https://inciensa.sa.cr/vigilancia\\_epidemiologica/informes\\_vigilancia/2020/Virologia/Informe%20anual%20Arbovirus%202019%20MGErev.pdf](https://inciensa.sa.cr/vigilancia_epidemiologica/informes_vigilancia/2020/Virologia/Informe%20anual%20Arbovirus%202019%20MGErev.pdf)  
613

- 614 40. Vicente-Santos A, Moreira-Soto A, Soto-Garita C, Chaverri LG, Chaves A,  
615 Drexler JF, et al. Neotropical bats that co-habit with humans function as dead-end  
616 hosts for dengue virus. *PLoS Negl Trop Dis*. 2017;11(5):e0005537. Epub  
617 2017/05/18. doi: 10.1371/journal.pntd.0005537. PubMed PMID: 28545090;  
618 PubMed Central PMCID: PMC5451070.
- 619 41. Soto-Garita C, Somogyi T, Vicente-Santos A, Corrales-Aguilar E. Molecular  
620 Characterization of Two Major Dengue Outbreaks in Costa Rica. *Am J Trop Med  
621 Hyg*. 2016;95(1):201-5. Epub 2016/05/02. doi: 10.4269/ajtmh.15-0835. PubMed  
622 PMID: 27139442; PubMed Central PMCID: PMC4944690.
- 623 42. Lustig Y, Sofer D, Bucris ED, Mendelson E. Surveillance and Diagnosis of  
624 West Nile Virus in the Face of Flavivirus Cross-Reactivity. *Front Microbiol*.  
625 2018;9:2421. Epub 2018/10/11. doi: 10.3389/fmicb.2018.02421. PubMed PMID:  
626 30369916; PubMed Central PMCID: PMC6194321.
- 627 43. Dente MG, Riccardo F, Bolici F, Colella NA, Jovanovic V, Drakulovic M, et  
628 al. Implementation of the One Health approach to fight arbovirus infections in the  
629 Mediterranean and Black Sea Region: Assessing integrated surveillance in Serbia,  
630 Tunisia and Georgia. *Zoonoses Public Health*. 2019;66(3):276-87. Epub  
631 2019/02/05. doi: 10.1111/zph.12562. PubMed PMID: 30724030; PubMed Central  
632 PMCID: PMC6850493.
- 633 44. Ministerio de Salud [Internet]. Análisis de situación de salud 2017-2018  
634 [cited 10 February 2021]. Available from:  
635 [https://www.ministeriodesalud.go.cr/index.php/vigilancia-de-la-salud/analisis-de-](https://www.ministeriodesalud.go.cr/index.php/vigilancia-de-la-salud/analisis-de-situacion-de-salud)  
636 [situacion-de-salud](https://www.ministeriodesalud.go.cr/index.php/vigilancia-de-la-salud/analisis-de-situacion-de-salud).
- 637 45. Servicio Nacional de Salud Animal [Internet]. Boletín Epidemiológico  
638 Febrero 2016 [cited 15 June 2020]. Available from:  
639 [http://www.senasa.go.cr/informacion/centro-de-informacion/informacion/estado-](http://www.senasa.go.cr/informacion/centro-de-informacion/informacion/estado-sanitario/boletines-epidemiologicos)  
640 [sanitario/boletines-epidemiologicos](http://www.senasa.go.cr/informacion/centro-de-informacion/informacion/estado-sanitario/boletines-epidemiologicos)
- 641 46. Garrigues R, Dean R. *The Birds of Costa Rica: A Field Guide*. 1 st ed. New  
642 York: Cornell University Press; 2007.
- 643 47. American Veterinary Medical Association, Ad Hoc Committee on Panel on  
644 Euthanasia. *Guidelines for the euthanasia of animals*. Schaumburg (IL): AVMA;  
645 2013. 121p.
- 646 48. Darsie RF. *Key to mosquitoes of Costa Rica (Diptera: Culicidae)*. 1st United  
647 States of America: International Center for Disease Control; 1993.
- 648 49. Yeh JY, Lee JH, Park JY, Seo HJ, Moon JS, Cho IS, et al. A diagnostic  
649 algorithm to serologically differentiate West Nile virus from Japanese encephalitis  
650 virus infections and its validation in field surveillance of poultry and horses. *Vector  
651 Borne Zoonotic Dis*. 2012;12(5):372-9. Epub 2012/01/04. doi:  
652 10.1089/vbz.2011.0709. PubMed PMID: 22217162; PubMed Central PMCID:  
653 PMC3353748.
- 654 50. Komar N, Langevin S, Monath TP. Use of a surrogate chimeric virus to  
655 detect West Nile virus-neutralizing antibodies in avian and equine sera. *Clin*

- 656 Vaccine Immunol. 2009;16(1):134-5. Epub 2008/11/12. doi: 10.1128/CVI.00220-  
657 08. PubMed PMID: 19005021; PubMed Central PMCID: PMCPMC2620674.
- 658 51. Guy B, Guirakhoo F, Barban V, Higgs S, Monath TP, Lang J. Preclinical and  
659 clinical development of YFV 17D-based chimeric vaccines against dengue, West  
660 Nile and Japanese encephalitis viruses. *Vaccine*. 2010;28(3):632-49. Epub  
661 2009/10/04. doi: 10.1016/j.vaccine.2009.09.098. PubMed PMID: 19808029.
- 662 52. Pugachev KV, Guirakhoo F, Trent DW, Monath TP. Chimeric vaccines  
663 against Japanese encephalitis, dengue, and West Nile. In: Levine MM et al,  
664 editors. *New generation vaccines*. New York, USA: Informa Healthcare 2010. p.  
665 557-69
- 666 53. Johnson AJ, Langevin S, Wolff KL, Komar N. Detection of anti-West Nile  
667 virus immunoglobulin M in chicken serum by an enzyme-linked immunosorbent  
668 assay. *J Clin Microbiol*. 2003;41(5):2002-7. doi: 10.1128/jcm.41.5.2002-2007.2003.  
669 PubMed PMID: 12734241; PubMed Central PMCID: PMCPMC154686.
- 670 54. Simões M, Camacho LA, Yamamura AM, Miranda EH, Cajaraville AC, da  
671 Silva Freire M. Evaluation of accuracy and reliability of the plaque reduction  
672 neutralization test (micro-PRNT) in detection of yellow fever virus antibodies.  
673 *Biologicals*. 2012;40(6):399-404. Epub 2012/09/30. doi:  
674 10.1016/j.biologicals.2012.09.005. PubMed PMID: 23034357.
- 675 55. Scaramozzino N, Crance JM, Jouan A, DeBriel DA, Stoll F, Garin D.  
676 Comparison of flavivirus universal primer pairs and development of a rapid, highly  
677 sensitive heminested reverse transcription-PCR assay for detection of flaviviruses  
678 targeted to a conserved region of the NS5 gene sequences. *J Clin Microbiol*.  
679 2001;39(5):1922-7. doi: 10.1128/JCM.39.5.1922-1927.2001. PubMed PMID:  
680 11326014; PubMed Central PMCID: PMCPMC88049.
- 681 56. Kumar S, Stecher G, Li M, Knyaz C, Tamura K. MEGA X: Molecular  
682 Evolutionary Genetics Analysis across Computing Platforms. *Mol Biol Evol*.  
683 2018;35(6):1547-9. doi: 10.1093/molbev/msy096. PubMed PMID: 29722887;  
684 PubMed Central PMCID: PMCPMC5967553.
- 685 57. Townzen JS, Brower AV, Judd DD. Identification of mosquito bloodmeals  
686 using mitochondrial cytochrome oxidase subunit I and cytochrome b gene  
687 sequences. *Med Vet Entomol*. 2008;22(4):386-93. doi: 10.1111/j.1365-  
688 2915.2008.00760.x. PubMed PMID: 19120966.
- 689 58. La Sorte FA, Fink D, Hochachka WM, Kelling S. Convergence of broad-  
690 scale migration strategies in terrestrial birds. *Proc Biol Sci*. 2016;283(1823). doi:  
691 10.1098/rspb.2015.2588. PubMed PMID: 26791618; PubMed Central PMCID:  
692 PMCPMC4795029.
- 693 59. Dolz G, Chaves A, Gutiérrez-Espeleta GA, Ortiz-Malavasi E, Bernal-Valle S,  
694 Herrero MV. Detection of antibodies against flavivirus over time in wild non-human  
695 primates from the lowlands of Costa Rica. *PLoS One*. 2019;14(7):e0219271. Epub  
696 2019/07/05. doi: 10.1371/journal.pone.0219271. PubMed PMID: 31276532;  
697 PubMed Central PMCID: PMCPMC6611622.



- 698 60. Tesh RB, Travassos da Rosa AP, Guzman H, Araujo TP, Xiao SY.  
699 Immunization with heterologous flaviviruses protective against fatal West Nile  
700 encephalitis. *Emerg Infect Dis.* 2002;8(3):245-51. doi: 10.3201/eid0803.010238.  
701 PubMed PMID: 11927020; PubMed Central PMCID: PMCPMC2732478.
- 702 61. Rappole JH, Derrickson SR, Hubálek Z. Migratory birds and spread of West  
703 Nile virus in the Western Hemisphere. *Emerg Infect Dis.* 2000;6(4):319-28. doi:  
704 10.3201/eid0604.000401. PubMed PMID: 10905964; PubMed Central PMCID:  
705 PMCPMC2640881.
- 706 62. Reed KD, Meece JK, Henkel JS, Shukla SK. Birds, migration and emerging  
707 zoonoses: west nile virus, lyme disease, influenza A and enteropathogens. *Clin*  
708 *Med Res.* 2003;1(1):5-12. doi: 10.3121/cmr.1.1.5. PubMed PMID: 15931279;  
709 PubMed Central PMCID: PMCPMC1069015.
- 710 63. Hannon ER, Jackson KC, Biggerstaff BJ, Raman V, Komar N. Bloodmeal  
711 Host Selection of *Culex quinquefasciatus* (Diptera: Culicidae) in Las Vegas,  
712 Nevada, United States. *J Med Entomol.* 2019;56(3):603-8. doi: 10.1093/jme/tjy237.  
713 PubMed PMID: 30668743.
- 714 64. Richards SL, Anderson SL, Lord CC, Smartt CT, Tabachnick WJ.  
715 Relationships between infection, dissemination, and transmission of West Nile  
716 virus RNA in *Culex pipiens quinquefasciatus* (Diptera: Culicidae). *J Med Entomol.*  
717 2012;49(1):132-42. doi: 10.1603/me10280. PubMed PMID: 22308781; PubMed  
718 Central PMCID: PMCPMC3320798.
- 719 65. Sallam MF, Michaels SR, Riegel C, Pereira RM, Zipperer W, Lockaby BG, et  
720 al. Spatio-Temporal Distribution of Vector-Host Contact (VHC) Ratios and  
721 Ecological Niche Modeling of the West Nile Virus Mosquito Vector, *Culex*  
722 *quinquefasciatus*, in the City of New Orleans, LA, USA. *Int J Environ Res Public*  
723 *Health.* 2017;14(8). Epub 2017/08/08. doi: 10.3390/ijerph14080892. PubMed  
724 PMID: 28786934; PubMed Central PMCID: PMCPMC5580596.
- 725 66. Colton L, Nasci RS. Quantification of West Nile virus in the saliva of *Culex*  
726 species collected from the southern United States. *J Am Mosq Control Assoc.*  
727 2006;22(1):57-63. doi: 10.2987/8756-971X(2006)22[57:QOWNVI]2.0.CO;2.  
728 PubMed PMID: 16646323.
- 729 67. Mattar S, Komar N, Young G, Alvarez J, Gonzalez M. Seroconversion for  
730 West Nile and St. Louis encephalitis viruses among sentinel horses in Colombia.  
731 *Mem Inst Oswaldo Cruz.* 2011;106(8):976-9. doi: 10.1590/s0074-  
732 02762011000800012. PubMed PMID: 22241119.
- 733 68. Silva JR, Romeiro MF, Souza WM, Munhoz TD, Borges GP, Soares OA, et  
734 al. A Saint Louis encephalitis and Rocio virus serosurvey in Brazilian horses. *Rev*  
735 *Soc Bras Med Trop.* 2014;47(4):414-7. doi: 10.1590/0037-8682-0117-2014.  
736 PubMed PMID: 25229279.
- 737 69. Katzelnick LC, Narvaez C, Arguello S, Lopez Mercado B, Collado D, Ampie  
738 O, et al. Zika virus infection enhances future risk of severe dengue disease.  
739 *Science.* 2020;369(6507):1123-8. doi: 10.1126/science.abb6143. PubMed PMID:  
740 32855339; PubMed Central PMCID: PMCPMC8274975.

741

## 742 Supporting information

743 **S1 Table.** List of captured wild birds species in the 2 sites of study in Costa Rica  
744 (Cuajiniquil and Talamanca) during 2017-2018

745 **S2 Table.** List of captured mosquitoes species by household, tramp, and number of  
746 individuals per pool.

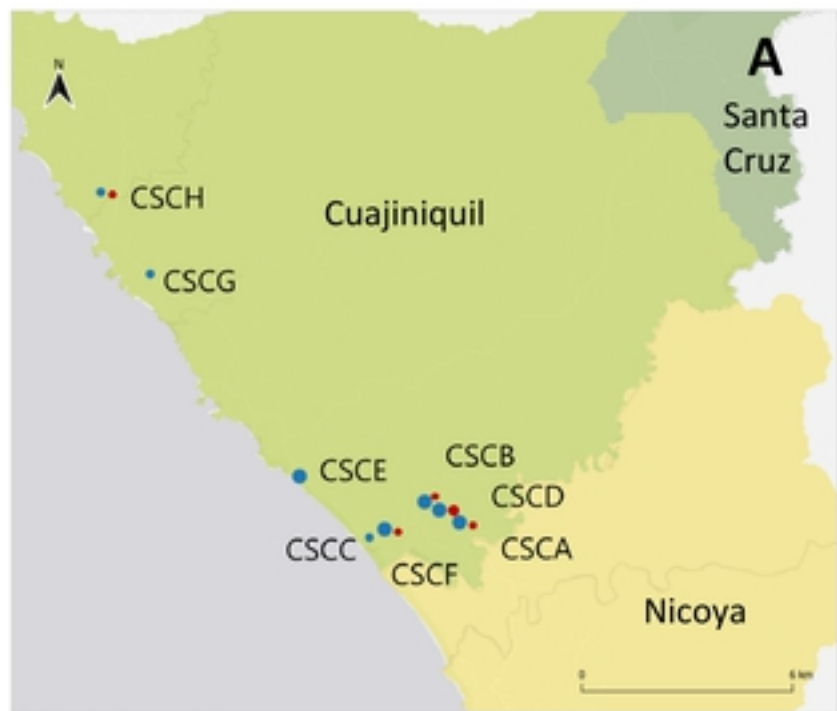

- Serum samples positive to WNV
- Serum samples positive to SLEV

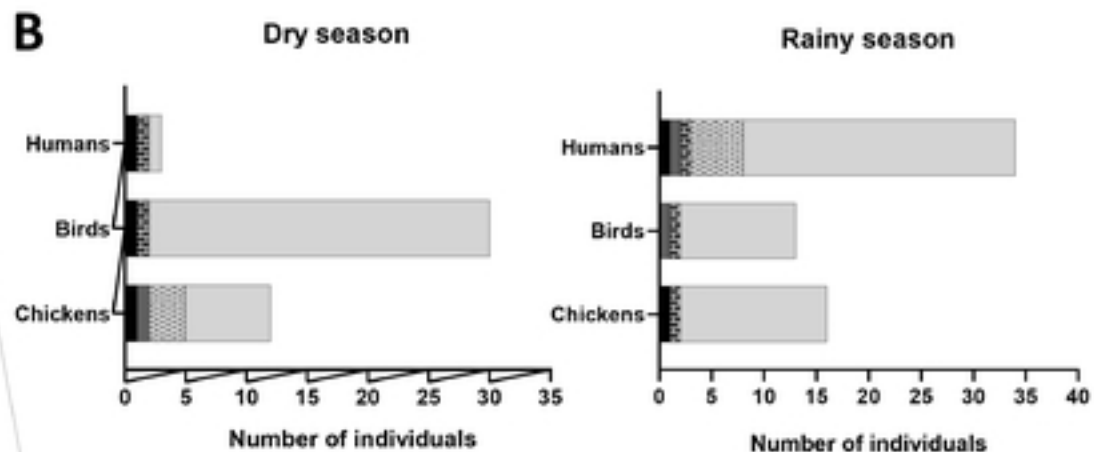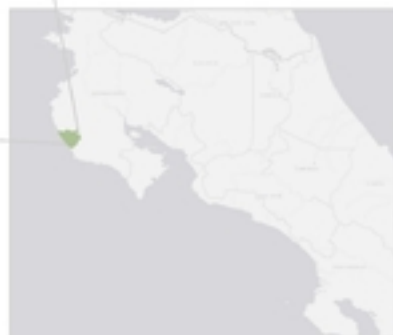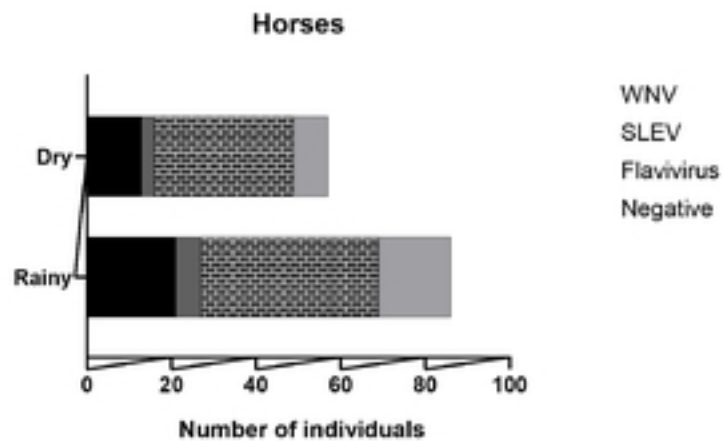



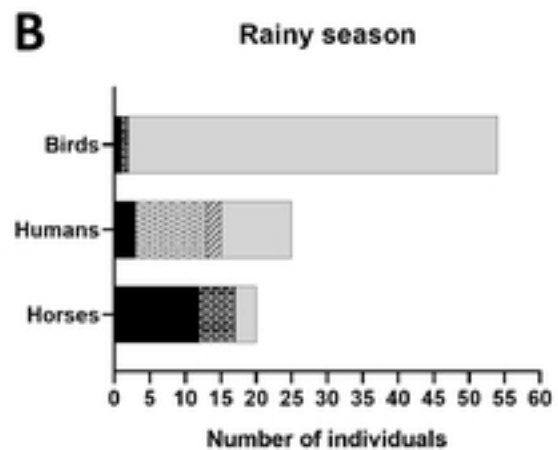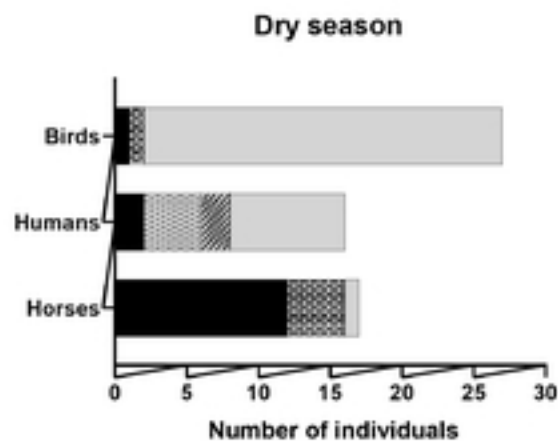

■ SLEV  
 ▨ Flavivirus  
 ▩ DENV-1  
 ▧ DENV-2  
 □ Negative

**A**

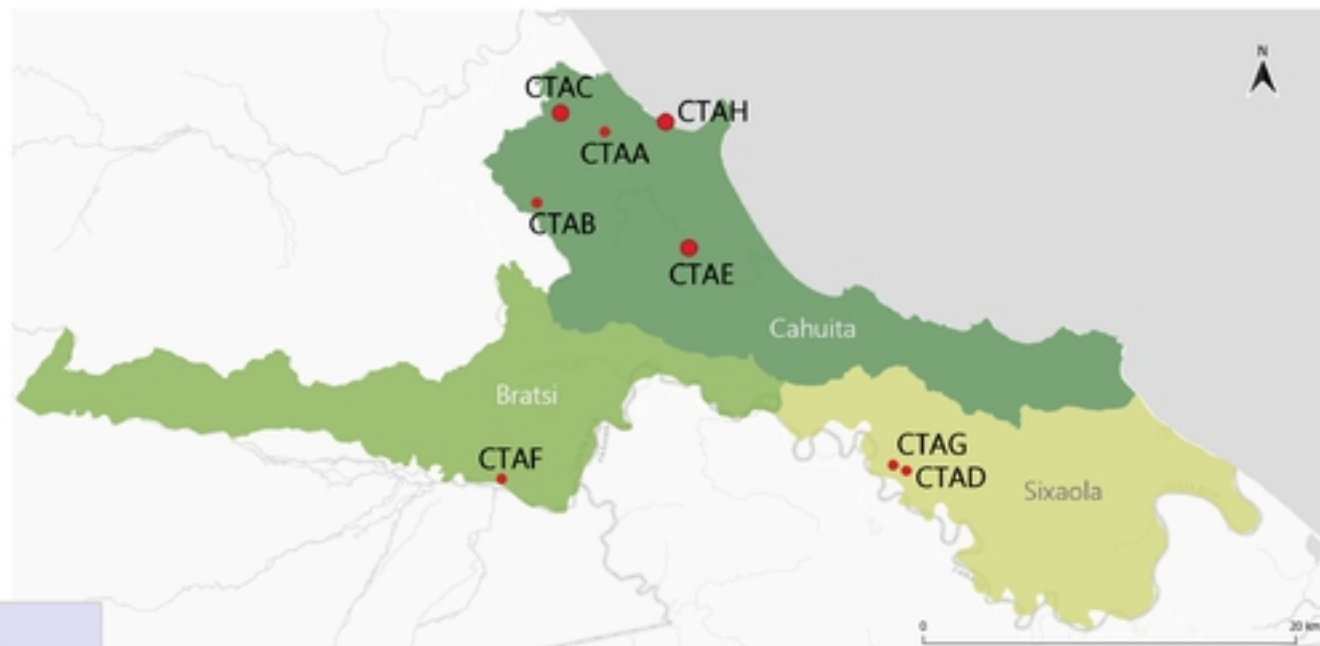

● Serum samples positive to SLEV

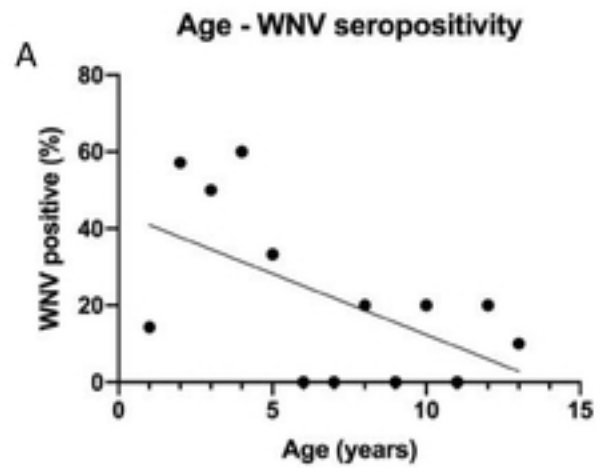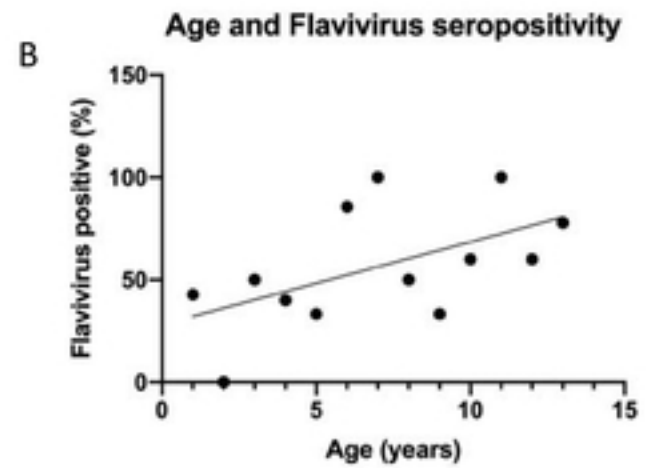

Source: https://medrxiv.org/content/10.1101/2021.09.09.21263313v1.full.pdf
